# Supplementary material for: Thrombopoietin Receptor Levels in Tumor Cell Lines and Primary Tumors
Source: PubMed Central journal article supplement (PMC3026977; doi:10.1155/2010/135354), 2010-12-28
Supplement: 135354.f1.pdf [file 135354.f1.pdf]

## Supplemental Data

Primers used in the TPO-R expression study.

| <b>MPL</b>   |                                       |
|--------------|---------------------------------------|
| Forward      | AGTGAACCCAGCCTCCTTG                   |
| Reverse      | CTGCAATCTTCGGTAGTCCATCTG              |
| Probe        | FAM-CAAGTCCTCAGAGGACTCCTTTGCC-TAMRA   |
| <b>EPOR</b>  |                                       |
| Forward      | GCTATGTGGCTTGCTCTTAGGACAC             |
| Reverse      | CCATCCCTGTTCCATAAGTCTTGAG             |
| Probe        | FAM-ATTGGATCCCTGATCATCTGCAGCCTG       |
| <b>ERBB2</b> |                                       |
| Forward      | AGCCCAGCCTTCGACAACC                   |
| Reverse      | GTCCCTTTGAAGGTGCTGGG                  |
| Probe        | FAM-ATTACTGGGACCAGGACCCACCAGAGC       |
| <b>IGF1R</b> |                                       |
| Forward      | GATTCAGATGGCCGGAGAGA                  |
| Reverse      | TGTGGACGAACTTATTGGCG                  |
| Probe        | FAM-TGCAGACGGCATGGCATACTCA            |
| <b>GAPDH</b> |                                       |
| Forward      | CAAGGTCATCCATGACAACCTTTG              |
| Reverse      | GGCCATCCACAGTCTTCTG                   |
| Probe        | FAM-ACCACAGTCCATGCCATCACTGCC A-TAMRA  |
| <b>PPIA</b>  |                                       |
| Forward      | CATCTGCACTGCCAAGACTGA                 |
| Reverse      | TGCCTTCTTCACTTTGCCA                   |
| Probe        | FAM-CACCACATGCTTGCCATCCAACCA-TAMRA    |
| <b>ACTB</b>  |                                       |
| Forward      | GAGCTACGAGCTGCCTGACG                  |
| Reverse      | GATGTTTCGTGGATGCCACAGGAC              |
| Probe        | FAM-CATCACCATTGGCAATGAGCGGTT CC-TAMRA |

Cell lines used in this study. Human tumor cell line name, tissue of origin and donor description used for quantitative PCR analysis. Cell lines are listed in the order presented in the graphs.

| <b>Cell Line</b> | <b>Tissue</b> | <b>Tumor Type</b>            | <b>Cell Source</b> |
|------------------|---------------|------------------------------|--------------------|
| NCI-H295R        | Adrenal gland | Adrenal gland carcinoma      | ATCC               |
| 5637             | Bladder       | Carcinoma                    | ATCC               |
| 639-V            | Bladder       | Transitional cell carcinoma  | DSMZ               |
| 647-V            | Bladder       | Carcinoma                    | DSMZ               |
| BFTC-905         | Bladder       | Transitional cell carcinoma  | DSMZ               |
| HT-1197          | Bladder       | Transitional cell carcinoma  | ATCC               |
| HT1376           | Bladder       | Transitional cell carcinoma  | ATCC               |
| J82              | Bladder       | Transitional cell carcinoma  | ATCC               |
| SCaBER           | Bladder       | Squamous cell carcinoma      | ATCC               |
| SW780            | Bladder       | Transitional cell carcinoma  | ATCC               |
| T24              | Bladder       | Transitional cell carcinoma  | DSMZ               |
| UM-UC-3          | Bladder       | Transitional cell carcinoma  | ATCC               |
| 1A2              | Blood/marrow  | B lymphoblast leukemia       | ATCC               |
| ARH-77           | Blood/marrow  | Plasma cell myeloma          | ATCC               |
| BC-1             | Blood/marrow  | B-cell lymphoma              | ATCC               |
| BC-2             | Blood/marrow  | B-cell lymphoma              | ATCC               |
| BC-3             | Blood/marrow  | B-cell lymphoma              | ATCC               |
| BDCM             | Blood/marrow  | Acute myeloid leukemia       | ATCC               |
| BV-173           | Blood/marrow  | Chronic myeloid leukemia     | DSMZ               |
| CA46             | Blood/marrow  | Burkitt's lymphoma           | ATCC               |
| CCRF-CEM         | Blood/marrow  | Acute lymphoblastic leukemia | ATCC               |
| CEM/C1           | Blood/marrow  | Acute lymphoblastic leukemia | ATCC               |
| CESS             | Blood/marrow  | Acute myeloid leukemia       | ATCC               |
| CRO-AP2          | Blood/marrow  | B-cell lymphoma              | DSMZ               |
| CRO-AP5          | Blood/marrow  | B-cell lymphoma              | DSMZ               |

| <b>Cell Line</b> | <b>Tissue</b> | <b>Tumor Type</b>                 | <b>Cell Source</b> |
|------------------|---------------|-----------------------------------|--------------------|
| Daudi            | Blood/marrow  | Burkitt's lymphoma                | ATCC               |
| DB               | Blood/marrow  | Diffuse large B cell lymphoma     | ATCC               |
| DG-75            | Blood/marrow  | Burkitt's lymphoma                | ATCC               |
| EB-1             | Blood/marrow  | Burkitt's lymphoma                | DSMZ               |
| EB-2             | Blood/marrow  | Burkitt's lymphoma                | ATCC               |
| EB-3             | Blood/marrow  | Burkitt's lymphoma                | ATCC               |
| F-36P            | Blood/marrow  | Acute myeloid leukemia            | DSMZ               |
| HD-MY-Z          | Blood/marrow  | Hodgkin disease                   | DSMZ               |
| HEL 92.1.7       | Blood/marrow  | Erythroleukemia                   | ATCC               |
| HH               | Blood/marrow  | Cutaneous T-cell lymphoma         | ATCC               |
| HL-60            | Blood/marrow  | Acute myeloid leukemia            | DSMZ               |
| HS-Sultan        | Blood/marrow  | Burkitt's lymphoma                | ATCC               |
| HT               | Blood/marrow  | B-cell lymphoma                   | DSMZ               |
| HuT-78           | Blood/marrow  | Cutaneous T-cell lymphoma         | ATCC               |
| J.RT3-T3.5       | Blood/marrow  | Acute lymphoblastic leukemia      | ATCC               |
| Jiyoye           | Blood/marrow  | Burkitt's lymphoma                | ATCC               |
| Jurkat           | Blood/marrow  | Acute lymphoblastic leukemia      | ATCC               |
| JVM-3            | Blood/marrow  | Acute B-cell lymphocytic leukemia | DSMZ               |
| K-562            | Blood/marrow  | Chronic myeloid leukemia          | ATCC               |
| Kasumi-2         | Blood/marrow  | B-cell leukemia                   | DSMZ               |
| KG-1             | Blood/marrow  | Acute myeloid leukemia            | ATCC               |
| KU812            | Blood/marrow  | Chronic myeloid leukemia          | DSMZ               |
| L-428            | Blood/marrow  | Hodgkin disease                   | DSMZ               |
| MC/CAR           | Blood/marrow  | Plasmacytoma/myeloma              | ATCC               |
| MC-116           | Blood/marrow  | B-cell lymphoma                   | DSMZ               |
| MEC-1            | Blood/marrow  | B cell lymphocytic leukemia       | DSMZ               |

| <b>Cell Line</b> | <b>Tissue</b> | <b>Tumor Type</b>                           | <b>Cell Source</b> |
|------------------|---------------|---------------------------------------------|--------------------|
| MEG-01           | Blood/marrow  | Chronic myeloid leukemia                    | ATCC               |
| MHH-PREB-1       | Blood/marrow  | B-cell lymphoma                             | DSMZ               |
| MJ               | Blood/marrow  | Cutaneous T-cell lymphoma                   | ATCC               |
| ML-2             | Blood/marrow  | Acute myeloid leukemia                      | DSMZ               |
| MOLT-16          | Blood/marrow  | Acute lymphoblastic leukemia                | DSMZ               |
| MOLT-4           | Blood/marrow  | Acute lymphoblastic leukemia                | ATCC               |
| MV-4-11          | Blood/marrow  | Biphenotypic B-cell myelomonocytic leukemia | ATCC               |
| NALM-6           | Blood/marrow  | Acute B-cell lymphocytic leukemia           | DSMZ               |
| NAMALWA          | Blood/marrow  | Burkitt's lymphoma                          | ATCC               |
| NOMO-1           | Blood/marrow  | Acute myeloid leukemia                      | DSMZ               |
| OCI-M1           | Blood/marrow  | Acute myelogenous leukemia                  | DSMZ               |
| P3HR1            | Blood/marrow  | Burkitt's lymphoma                          | ATCC               |
| PLB-985          | Blood/marrow  | Promyelocytic leukemia                      | DSMZ               |
| RAJI             | Blood/marrow  | Burkitt's lymphoma                          | ATCC               |
| RCH-ACV          | Blood/marrow  | Acute lymphoblastic leukemia                | DSMZ               |
| RC-K8            | Blood/marrow  | B-cell lymphoma                             | DSMZ               |
| REC-1            | Blood/marrow  | Diffuse non-Hodgkin lymphoma                | ATCC               |
| RL               | Blood/marrow  | Non-Hodgkin lymphoma                        | ATCC               |
| RPMI-6666        | Blood/marrow  | Hodgkin disease                             | ATCC               |
| RPMI-8226        | Blood/marrow  | Myeloma, plasmacytoma                       | ATCC               |
| SC-1             | Blood/marrow  | B-cell lymphoma                             | ATCC               |
| SR               | Blood/marrow  | Large B cell lymphoma                       | ATCC               |
| ST486            | Blood/marrow  | Burkitt's lymphoma                          | ATCC               |
| SU-DHL-16        | Blood/marrow  | Non-Hodgkin lymphoma                        | DSMZ               |
| SU-DHL-4         | Blood/marrow  | B-cell lymphoma                             | DSMZ               |
| SU-DHL-5         | Blood/marrow  | Non-Hodgkin lymphoma                        | DSMZ               |

| Cell Line  | Tissue       | Tumor Type                   | Cell Source |
|------------|--------------|------------------------------|-------------|
| SU-DHL-6   | Blood/marrow | B-cell lymphoma              | ATCC        |
| SUP-B15    | Blood/marrow | Acute lymphoblastic leukemia | ATCC        |
| TANOUE     | Blood/marrow | Acute lymphoblastic leukemia | DSMZ        |
| THP-1      | Blood/marrow | Acute myeloid leukemia       | ATCC        |
| Toledo     | Blood/marrow | Diffuse non-Hodgkin lymphoma | ATCC        |
| U266B1     | Blood/marrow | Myeloma                      | ATCC        |
| A204       | Bone/muscle  | Rhabdomyosarcoma             | ATCC        |
| A-673      | Bone/muscle  | Rhabdomyosarcoma             | ATCC        |
| GCT        | Bone/muscle  | Fibrous histiocytoma         | ATCC        |
| HOS        | Bone/muscle  | Osteosarcoma                 | ATCC        |
| HT-1080    | Bone/muscle  | Fibrosarcoma                 | ATCC        |
| KHOS-240S  | Bone/muscle  | Osteosarcoma                 | ATCC        |
| MG-63      | Bone/muscle  | Osteosarcoma                 | ATCC        |
| RD         | Bone/muscle  | Osteosarcoma                 | ATCC        |
| RD-ES      | Bone/muscle  | Ewing's sarcoma              | ATCC        |
| Saos-2     | Bone/muscle  | Osteosarcoma                 | ATCC        |
| SJRH30     | Bone/muscle  | Rhabdomyosarcoma             | ATCC        |
| SW684      | Bone/muscle  | Fibrosarcoma                 | ATCC        |
| SW872      | Bone/muscle  | Liposarcoma                  | ATCC        |
| SW982      | Bone/muscle  | Synovial sarcoma             | ATCC        |
| U-2 OS     | Bone/muscle  | Osteosarcoma                 | ATCC        |
| TE381.T    | Bone/muscle  | Rhabdomyosarcoma             | ATCC        |
| A172       | Brain        | Glioblastoma                 | ATCC        |
| CHP-212    | Brain        | Neuroblastoma                | ATCC        |
| D283-Med   | Brain        | Medulloblastoma              | ATCC        |
| DBTRG-05MG | Brain        | Glioblastoma                 | ATCC        |

| <b>Cell Line</b> | <b>Tissue</b> | <b>Tumor Type</b> | <b>Cell Source</b> |
|------------------|---------------|-------------------|--------------------|
| DK-MG            | Brain         | Glioblastoma      | DSMZ               |
| H4               | Brain         | Neuroglioma       | ATCC               |
| M059J            | Brain         | Glioma            | ATCC               |
| M059K            | Brain         | Glioma            | ATCC               |
| MC-IXC           | Brain         | Neuroblastoma     | ATCC               |
| SF268            | Brain         | Glioblastoma      | NCI-60             |
| SF295            | Brain         | Glioblastoma      | NCI-60             |
| SF-539           | Brain         | Glioblastoma      | NCI-60             |
| SK-N-AS          | Brain         | Neuroblastoma     | ATCC               |
| SK-N-BE(2)       | Brain         | Neuroblastoma     | ATCC               |
| SK-N-DZ          | Brain         | Neuroblastoma     | ATCC               |
| SK-N-F1          | Brain         | Neuroblastoma     | ECACC              |
| SNB-19           | Brain         | Glioblastoma      | DSMZ               |
| SW1088           | Brain         | Glioblastoma      | ATCC               |
| SW1783           | Brain         | Glioblastoma      | ATCC               |
| U-251            | Brain         | Glioblastoma      | NCI-60             |
| U-87MG           | Brain         | Glioblastoma      | ATCC               |
| AU565            | Breast        | Breast carcinoma  | ATCC               |
| BT-20            | Breast        | Breast carcinoma  | ATCC               |
| BT474            | Breast        | Breast carcinoma  | ATCC               |
| BT-549           | Breast        | Breast carcinoma  | ATCC               |
| DU4475           | Breast        | Breast carcinoma  | DSMZ               |
| EFM-19           | Breast        | Breast carcinoma  | DSMZ               |
| HCC1143          | Breast        | Breast carcinoma  | ATCC               |
| HCC1569          | Breast        | Breast carcinoma  | ATCC               |
| HCC1599          | Breast        | Breast carcinoma  | ATCC               |

| <b>Cell Line</b> | <b>Tissue</b> | <b>Tumor Type</b>          | <b>Cell Source</b> |
|------------------|---------------|----------------------------|--------------------|
| HCC1937          | Breast        | Breast carcinoma           | ATCC               |
| HCC1954          | Breast        | breast carcinoma           | ATCC               |
| HCC202           | Breast        | Breast carcinoma           | ATCC               |
| HCC2157          | Breast        | Breast carcinoma           | ATCC               |
| HCC2218          | Breast        | Breast carcinoma           | ATCC               |
| HCC38            | Breast        | Breast carcinoma           | ATCC               |
| HS578T           | Breast        | Breast carcinoma           | ATCC               |
| KPL-1            | Breast        | Breast carcinoma           | DSMZ               |
| MDA-MB-157       | Breast        | Breast medullary carcinoma | ATCC               |
| MDA-MB-231       | Breast        | Breast carcinoma           | ATCC               |
| MDA-MB-361       | Breast        | Breast carcinoma           | ATCC               |
| MDA-MB-436       | Breast        | Breast carcinoma           | ATCC               |
| MDA-MB-453       | Breast        | Breast carcinoma           | ATCC               |
| MDA-MB-468       | Breast        | Breast carcinoma           | ATCC               |
| MT-3             | Breast        | Breast carcinoma           | DSMZ               |
| NCI/ADR RES      | Breast        | Breast carcinoma           | NCI-60             |
| SK-BR-3          | Breast        | Breast carcinoma           | ATCC               |
| T-47Dt           | Breast        | Breast carcinoma           | ATCC               |
| UACC-812         | Breast        | Breast carcinoma           | ATCC               |
| UACC-893         | Breast        | Breast carcinoma           | ATCC               |
| ZR-75-1          | Breast        | Breast carcinoma           | ATCC               |
| C-33 A           | Cervix        | Cervical carcinoma         | ATCC               |
| C-4I             | Cervix        | Cervical carcinoma         | ATCC               |
| C-4II            | Cervix        | Cervical carcinoma         | ATCC               |
| DoTc2-4510       | Cervix        | Cervical carcinoma         | ATCC               |
| HELA             | Cervix        | Cervical carcinoma         | ATCC               |

| <b>Cell Line</b> | <b>Tissue</b> | <b>Tumor Type</b>         | <b>Cell Source</b> |
|------------------|---------------|---------------------------|--------------------|
| COLO-201         | Colorectal    | Colorectal carcinoma      | ATCC               |
| COLO-205         | Colorectal    | Colorectal adenocarcinoma | ATCC               |
| COLO-320DM       | Colorectal    | Colorectal adenocarcinoma | ATCC               |
| COLO-320HSR      | Colorectal    | Colon adenocarcinoma      | ATCC               |
| DLD-1            | Colorectal    | Colon carcinoma           | ATCC               |
| HCC-2998         | Colorectal    | Colorectal carcinoma      | NCI-60             |
| HCT-15           | Colorectal    | Colon adenocarcinoma      | ATCC               |
| HCT-8            | Colorectal    | Ileocecal adenocarcinoma  | ATCC               |
| KM12             | Colorectal    | Colon adenocarcinoma      | NCI-60             |
| LoVo             | Colorectal    | Colon adenocarcinoma      | ATCC               |
| LS1034           | Colorectal    | Colorectal carcinoma      | ATCC               |
| LS-174T          | Colorectal    | Colon adenocarcinoma      | ATCC               |
| NCI-H508         | Colorectal    | Colorectal carcinoma      | ATCC               |
| NCI-H630         | Colorectal    | Rectal carcinoma          | ATCC               |
| NCI-H716         | Colorectal    | Colorectal carcinoma      | ATCC               |
| NCI-H747         | Colorectal    | Colorectal carcinoma      | ATCC               |
| RKO              | Colorectal    | Colon carcinoma           | ATCC               |
| RKO-E6           | Colorectal    | Colon carcinoma           | ATCC               |
| SW1116           | Colorectal    | Colon adenocarcinoma      | ATCC               |
| SW1417           | Colorectal    | Colon adenocarcinoma      | ATCC               |
| SW1463           | Colorectal    | Rectal carcinoma          | ATCC               |
| SW403            | Colorectal    | Colon adenocarcinoma      | ATCC               |
| SW48             | Colorectal    | Colon adenocarcinoma      | ATCC               |
| SW480            | Colorectal    | Colorectal adenocarcinoma | ATCC               |
| SW-620           | Colorectal    | Colorectal carcinoma      | NCI-60             |
| SW837            | Colorectal    | Rectal carcinoma          | ATCC               |



| <b>Cell Line</b> | <b>Tissue</b> | <b>Tumor Type</b>                  | <b>Cell Source</b> |
|------------------|---------------|------------------------------------|--------------------|
| SW948            | Colorectal    | Colorectal adenocarcinoma          | ATCC               |
| T84              | Colorectal    | Colorectal adenocarcinoma          | ATCC               |
| WIDR             | Colorectal    | Colorectal adenocarcinoma          | ATCC               |
| KYSE-30          | Esophageal    | Esophageal carcinoma               | DSMZ               |
| OE19             | Esophageal    | Esophageal carcinoma               | ECACC              |
| OE33             | Esophageal    | Esophageal carcinoma               | ECACC              |
| CAL-27           | Head/neck     | Squamous cell carcinoma of tongue  | ATCC               |
| Detroit562       | Head/neck     | Carcinoma of pharynx               | ATCC               |
| FaDu             | Head/neck     | Squamous cell carcinoma of pharynx | ATCC               |
| H157             | Head/neck     | Buccal mucosa squamous carcinoma   | ECACC              |
| RPMI-2650        | Head/neck     | Nasal squamous cell carcinoma      | ATCC               |
| SCC-15           | Head/neck     | Squamous cell carcinoma of tongue  | ATCC               |
| SCC-25           | Head/neck     | Squamous cell carcinoma of tongue  | ATCC               |
| SCC-4            | Head/neck     | Squamous cell carcinoma of tongue  | ATCC               |
| 769-P            | Kidney        | Renal cell adenocarcinoma          | ATCC               |
| 786-O            | Kidney        | Renal cell carcinoma               | ATCC               |
| A-498            | Kidney        | Renal cell carcinoma               | ATCC               |
| A704             | Kidney        | Renal cell adenocarcinoma          | ATCC               |
| ACHN             | Kidney        | Renal cell carcinoma               | ATCC               |
| Caki-1           | Kidney        | Clear cell carcinoma               | ATCC               |
| G-401            | Kidney        | Malignant rhabdoid                 | ATCC               |
| G-402            | Kidney        | Leiomyoblastoma                    | ATCC               |
| SN12C            | Kidney        | Renal cell carcinoma               | NCI-60             |
| TK-10            | Kidney        | Renal cell carcinoma               | NCI-60             |
| UO-31            | Kidney        | Renal cell carcinoma               | NCI-60             |
| Hep-3B           | Liver         | Hepatocellular carcinoma           | ATCC               |

| Cell Line  | Tissue | Tumor Type                          | Cell Source |
|------------|--------|-------------------------------------|-------------|
| HepG2      | Liver  | Hepatocellular carcinoma            | ATCC        |
| SNU-182    | Liver  | Hepatocellular carcinoma            | ATCC        |
| SNU-387    | Liver  | Hepatocellular carcinoma            | ATCC        |
| SNU-475    | Liver  | Hepatocellular carcinoma            | ATCC        |
| A-427      | Lung   | Lung carcinoma                      | DSMZ        |
| A549       | Lung   | Non-small cell lung carcinoma       | DSMZ        |
| Calu-1     | Lung   | Epidermoid carcinoma of the lung    | ATCC        |
| Calu-6     | Lung   | Adenocarcinoma of lung              | ATCC        |
| ChaGo-K-1  | Lung   | Squamous cell carcinoma of bronchus | ATCC        |
| COR-L105   | Lung   | Lung adenocarcinoma                 | ECACC       |
| COR-L279   | Lung   | Small cell lung cancer              | ECACC       |
| COR-L88    | Lung   | Small cell lung cancer              | ECACC       |
| DMS 114    | Lung   | Small cell lung carcinoma           | ATCC        |
| DMS 153    | Lung   | Small cell lung carcinoma           | ATCC        |
| DMS 273    | Lung   | Small cell lung carcinoma           | ECACC       |
| DMS 53     | Lung   | Small cell lung carcinoma           | ATCC        |
| EKVX       | Lung   | Lung adenocarcinoma                 |             |
| HOP-62     | Lung   | Adenocarcinoma                      | NCI-60      |
| HOP-92     | Lung   | Large cell carcinoma of lung        | NCI-60      |
| NCH-H1651  | Lung   | Non-small cell lung cancer          | ATCC        |
| NCI -H1155 | Lung   | Non-small cell lung carcinoma       | ATCC        |
| NCI-H1048  | Lung   | Small cell lung carcinoma           | ATCC        |
| NCI-H1092  | Lung   | Small cell lung carcinoma           | ATCC        |
| NCI-H1299  | Lung   | Non-small cell lung carcinoma       | ATCC        |
| NCI-H1395  | Lung   | Lung adenocarcinoma                 | ATCC        |
| NCI-H1437  | Lung   | Non-small cell lung carcinoma       | ATCC        |

| Cell Line | Tissue | Tumor Type                          | Cell Source |
|-----------|--------|-------------------------------------|-------------|
| NCI-H1563 | Lung   | Lung adenocarcinoma                 | ATCC        |
| NCI-H1573 | Lung   | Adenocarcinoma of lung              | ATCC        |
| NCI-H1581 | Lung   | Large cell carcinoma of lung        | ATCC        |
| NCI-H1618 | Lung   | Small cell carcinoma of lung        | ATCC        |
| NCI-H1623 | Lung   | Non-small cell lung carcinoma       | ATCC        |
| NCI-H1650 | Lung   | Squamous cell carcinoma of bronchus | ATCC        |
| NCI-H1666 | Lung   | Bronchioalveolar adenocarcinoma     | ATCC        |
| NCI-H1694 | Lung   | Squamous cell carcinoma of bronchus | ATCC        |
| NCI-H1703 | Lung   | Mixed adenosquamous lung carcinoma  | ATCC        |
| NCI-H1770 | Lung   | Large cell neuroendocrine carcinoma | ATCC        |
| NCI-H1793 | Lung   | Adenocarcinoma of lung              | ATCC        |
| NCI-H1838 | Lung   | Adenocarcinoma of lung              | ATCC        |
| NCI-H187  | Lung   | Small cell lung carcinoma           | ATCC        |
| NCI-H1930 | Lung   | Small cell lung carcinoma           | ATCC        |
| NCI-H1975 | Lung   | Adenocarcinoma of lung              | ATCC        |
| NCI-H1993 | Lung   | Adenocarcinoma of lung              | ATCC        |
| NCI-H2009 | Lung   | Adenocarcinoma of lung              | ATCC        |
| NCI-H2030 | Lung   | Non small cell lung carcinoma       | ATCC        |
| NCI-H2052 | Lung   | Lung mesothelioma                   | ATCC        |
| NCI-H2081 | Lung   | Small cell lung carcinoma           | ATCC        |
| NCI-H2087 | Lung   | Lung adenocarcinoma                 | ATCC        |
| NCI-H2122 | Lung   | Lung adenocarcinoma                 | ATCC        |
| NCI-H2126 | Lung   | Non-small cell lung cancer          | ATCC        |
| NCI-H2170 | Lung   | Lung squamous cell carcinoma        | ATCC        |
| NCI-H2171 | Lung   | Small cell lung carcinoma           | ATCC        |
| NCI-H226  | Lung   | Mesothelioma                        | ATCC        |

| <b>Cell Line</b> | <b>Tissue</b> | <b>Tumor Type</b>               | <b>Cell Source</b> |
|------------------|---------------|---------------------------------|--------------------|
| NCI-H23          | Lung          | Non-small cell lung carcinoma   | ATCC               |
| NCI-H2347        | Lung          | Non-small cell lung carcinoma   | ATCC               |
| NCI-H2405        | Lung          | Lung adenocarcinoma             | ATCC               |
| NCI-H292         | Lung          | Mucoepidermoid carcinoma        | ATCC               |
| NCI-H358         | Lung          | Bronchioalveolar carcinoma      | ATCC               |
| NCI-H441         | Lung          | Papillary adenocarcinoma        | ATCC               |
| NCI-H446         | Lung          | Small cell lung carcinoma       | ATCC               |
| NCI-H460         | Lung          | Large cell lung carcinoma       | ATCC               |
| NCI-H510         | Lung          | Small cell lung carcinoma       | ATCC               |
| NCI-H522         | Lung          | Small cell lung carcinoma       | ATCC               |
| NCI-H526         | Lung          | Small cell lung carcinoma       | ATCC               |
| NCI-H596         | Lung          | Adenosquamous carcinoma         | ATCC               |
| NCI-H650         | Lung          | Bronchioalveolar adenocarcinoma | ATCC               |
| NCI-H661         | Lung          | Non-small cell lung carcinoma   | ATCC               |
| NCI-H69          | Lung          | Small cell lung carcinoma       | ATCC               |
| NCI-H720         | Lung          | Atypical carcinoma              | ATCC               |
| NCI-H727         | Lung          | Pulmonary carcinoid             | ATCC               |
| NCI-H810         | Lung          | Large cell carcinoma            | ATCC               |
| NCI-H82          | Lung          | Small cell lung carcinoma       | ATCC               |
| NCI-H838         | Lung          | Non-small cell lung carcinoma   | ATCC               |
| SHP-77           | Lung          | Small cell lung carcinoma       | ATCC               |
| SK-MES-1         | Lung          | Squamous cell lung carcinoma    | ATCC               |
| SW1573           | Lung          | Adenocarcinoma                  | ATCC               |
| SW900            | Lung          | Squamous cell carcinoma of lung | ATCC               |
| UMC-11           | Lung          | Pulmonary carcinoma             | ATCC               |
| CaOV3            | Ovary         | Ovarian carcinoma               | ATCC               |

| Cell Line | Tissue   | Tumor Type                                | Cell Source |
|-----------|----------|-------------------------------------------|-------------|
| COLO-704  | Ovary    | Ovarian carcinoma                         | DSMZ        |
| OV-90     | Ovary    | Malignant papillary serous adenocarcinoma | ATCC        |
| OVCAR4    | Ovary    | Ovarian carcinoma                         | NCI-60      |
| OVCAR-8   | Ovary    | Ovarian carcinoma                         | NCI-60      |
| SKOV3     | Ovary    | Ovarian carcinoma                         | NCI-60      |
| AsPC-1    | Pancreas | Pancreatic carcinoma                      | ATCC        |
| BxPC-3    | Pancreas | Pancreatic adenocarcinoma                 | ATCC        |
| Capan-1   | Pancreas | Pancreatic adenocarcinoma                 | ATCC        |
| Capan-2   | Pancreas | Pancreatic carcinoma                      | ATCC        |
| HPAC      | Pancreas | Pancreatic carcinoma                      | ATCC        |
| HPAF-II   | Pancreas | Pancreatic adenocarcinoma                 | ATCC        |
| HuP-T4    | Pancreas | Pancreatic adenocarcinoma                 | ECACC       |
| MiaPaCa   | Pancreas | Pancreatic carcinoma                      | ATCC        |
| Panc02.03 | Pancreas | Pancreatic adenocarcinoma                 | ATCC        |
| Panc08.13 | Pancreas | Pancreatic carcinoma                      | ATCC        |
| PANC-1    | Pancreas | Pancreatic epithelioid carcinoma          | ATCC        |
| YAPC      | Pancreas | Pancreatic carcinoma                      | DSMZ        |
| PL45      | Pancreas | Pancreatic adenocarcinoma                 | ATCC        |
| BeWo      | Placenta | Choriocarcinoma                           | ATCC        |
| JAR       | Placenta | Choriocarcinoma                           | ATCC        |
| JEG-3     | Placenta | Choriocarcinoma                           | ATCC        |
| 22Rv1     | Prostate | Prostate carcinoma                        | ATCC        |
| BM-1604   | Prostate | Prostate carcinoma                        | DSMZ        |
| CA-HPV-10 | Prostate | Prostate carcinoma                        | ATCC        |
| DU145     | Prostate | Prostate carcinoma                        | ATCC        |
| LNCaP     | Prostate | Prostate carcinoma                        | ATCC        |

| Cell Line | Tissue   | Tumor Type                    | Cell Source |
|-----------|----------|-------------------------------|-------------|
| PC3       | Prostate | Prostate carcinoma            | ATCC        |
| RWPE-1    | Prostate | Prostate carcinoma            | ATCC        |
| Y79       | Retina   | Retinoblastoma                | ATCC        |
| A101D     | Skin     | Malignant melanoma            | ATCC        |
| A375      | Skin     | Malignant melanoma            | ATCC        |
| A375P     | Skin     | Malignant melanoma            | ECACC       |
| A-431     | Skin     | Epidermoid carcinoma          | ATCC        |
| A7        | Skin     | Malignant melanoma            | ATCC        |
| C32TG     | Skin     | Malignant melanoma            | ATCC        |
| CHL-1     | Skin     | Malign ant melanoma           | ATCC        |
| COLO-829  | Skin     | Malignant melanoma            | ATCC        |
| HMCB      | Skin     | Malignant melanoma            | ATCC        |
| M14       | Skin     | Malignant melanoma            | NCI-60      |
| MALME-3M  | Skin     | Malignant melanoma            | ATCC        |
| SH-4      | Skin     | Malignant melanoma            | ATCC        |
| SK-MEL-1  | Skin     | Malignant melanoma            | ATCC        |
| SK-MEL-2  | Skin     | Malignant melanoma            | ATCC        |
| SK-MEL-28 | Skin     | Malignant melanoma            | ATCC        |
| SK-MEL-3  | Skin     | Malignant melanoma            | ATCC        |
| SK-MEL-5  | Skin     | Malignant melanoma            | ATCC        |
| UACC-62   | Skin     | Malignant melanoma            | NCI-60      |
| WM-115    | Skin     | Malignant melanoma            | ATCC        |
| LOXIMVI   | Skin     | Malignant melanoma            | NCI-60      |
| AGS       | Stomach  | Adenocarcinoma of the stomach | ATCC        |
| HS746T    | Stomach  | Adenocarcinoma of the stomach | ATCC        |
| KATO_III  | Stomach  | Carcinoma of the stomach      | ATCC        |

| <b>Cell Line</b> | <b>Tissue</b> | <b>Tumor Type</b>        | <b>Cell Source</b> |
|------------------|---------------|--------------------------|--------------------|
| NCI-N87          | Stomach       | Carcinoma of the stomach | ATCC               |
| SNU-1            | Stomach       | Carcinoma of the stomach | ATCC               |
| SNU-16           | Stomach       | Carcinoma of the stomach | ATCC               |
| SNU-5            | Stomach       | Carcinoma of the stomach | ATCC               |
| BHT-101          | Thyroid       | Thyroid carcinoma        | DSMZ               |
| CAL-62           | Thyroid       | Thyroid carcinoma        | DSMZ               |
| CGTH-W-1         | Thyroid       | Thyroid carcinoma        | DSMZ               |
| SW579            | Thyroid       | Thyroid carcinoma        | ATCC               |
| TT               | Thyroid       | Thyroid carcinoma        | ATCC               |
| HEC-1-A          | Uterus        | Uterine carcinoma        | ATCC               |
| HEC-1-B          | Uterus        | Uterine carcinoma        | ATCC               |
| KLE              | Uterus        | Uterine carcinoma        | ATCC               |
| RL95-2           | Uterus        | Carcinoma of endometrium | ATCC               |
| SK-UT-1          | Uterus        | Uterine leiomyosarcoma   | ATCC               |
| AN3CA            | Uterus        | Uterus carcinoma         | ATCC               |
| SK-LMS-1         | Vulva         | Vulva leiomyosarcoma     | ATCC               |
| SW954            | Vulva         | Squamous cell carcinoma  | ATCC               |
| SW962            | Vulva         | Carcinoma                | ATCC               |

ATCC, American Type Culture Collection; DSMZ, German Collection of Microorganisms and Cell Cultures; NCI, National Cancer Institute; ECACC, European Collection of Cell Cultures.
